# Supplementary material for: A Warm Welcome to the Alps—The Northward Expansion of Trithemis annulata (Odonata, Libellulidae) in Italy
Source: MDPI journal article supplement (doi:10.3390/insects15050340), 2024-05-09
Supplement: s1 [file s1]

## A warm welcome to the Alps - the northward expansion of *Trithemis annulata* (Odonata, Libellulidae) in Italy

Gianandrea La Porta<sup>1,\*</sup> and Sönke Hardersen<sup>2</sup>

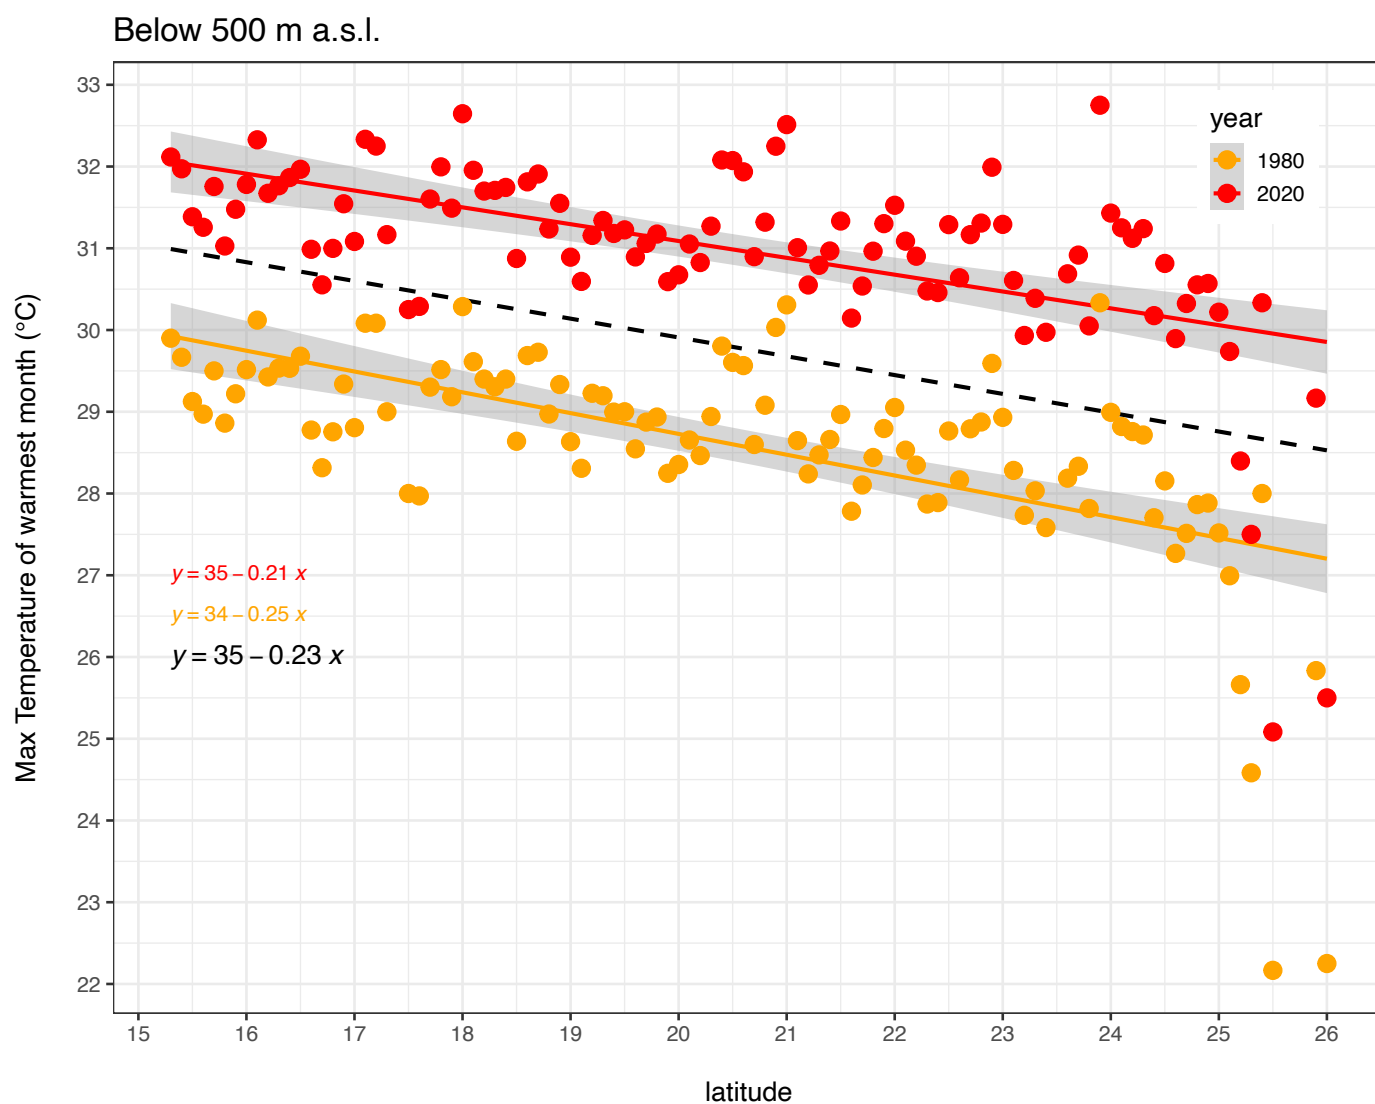

Figure S1: South–north gradient of the bioclimatic variable bio5. Data points represent temperature records at sites where *Trithemis annulata* had been recorded in 1980 or 2020.
